# Supplementary material
Source: PubMed Central journal article supplement (PMC4452468)

**SUPPORTING FIGURE S1 : RECONSTRUCTION FLOW FOR LINEAR AND GOLDEN ANGLE CMT MRI**

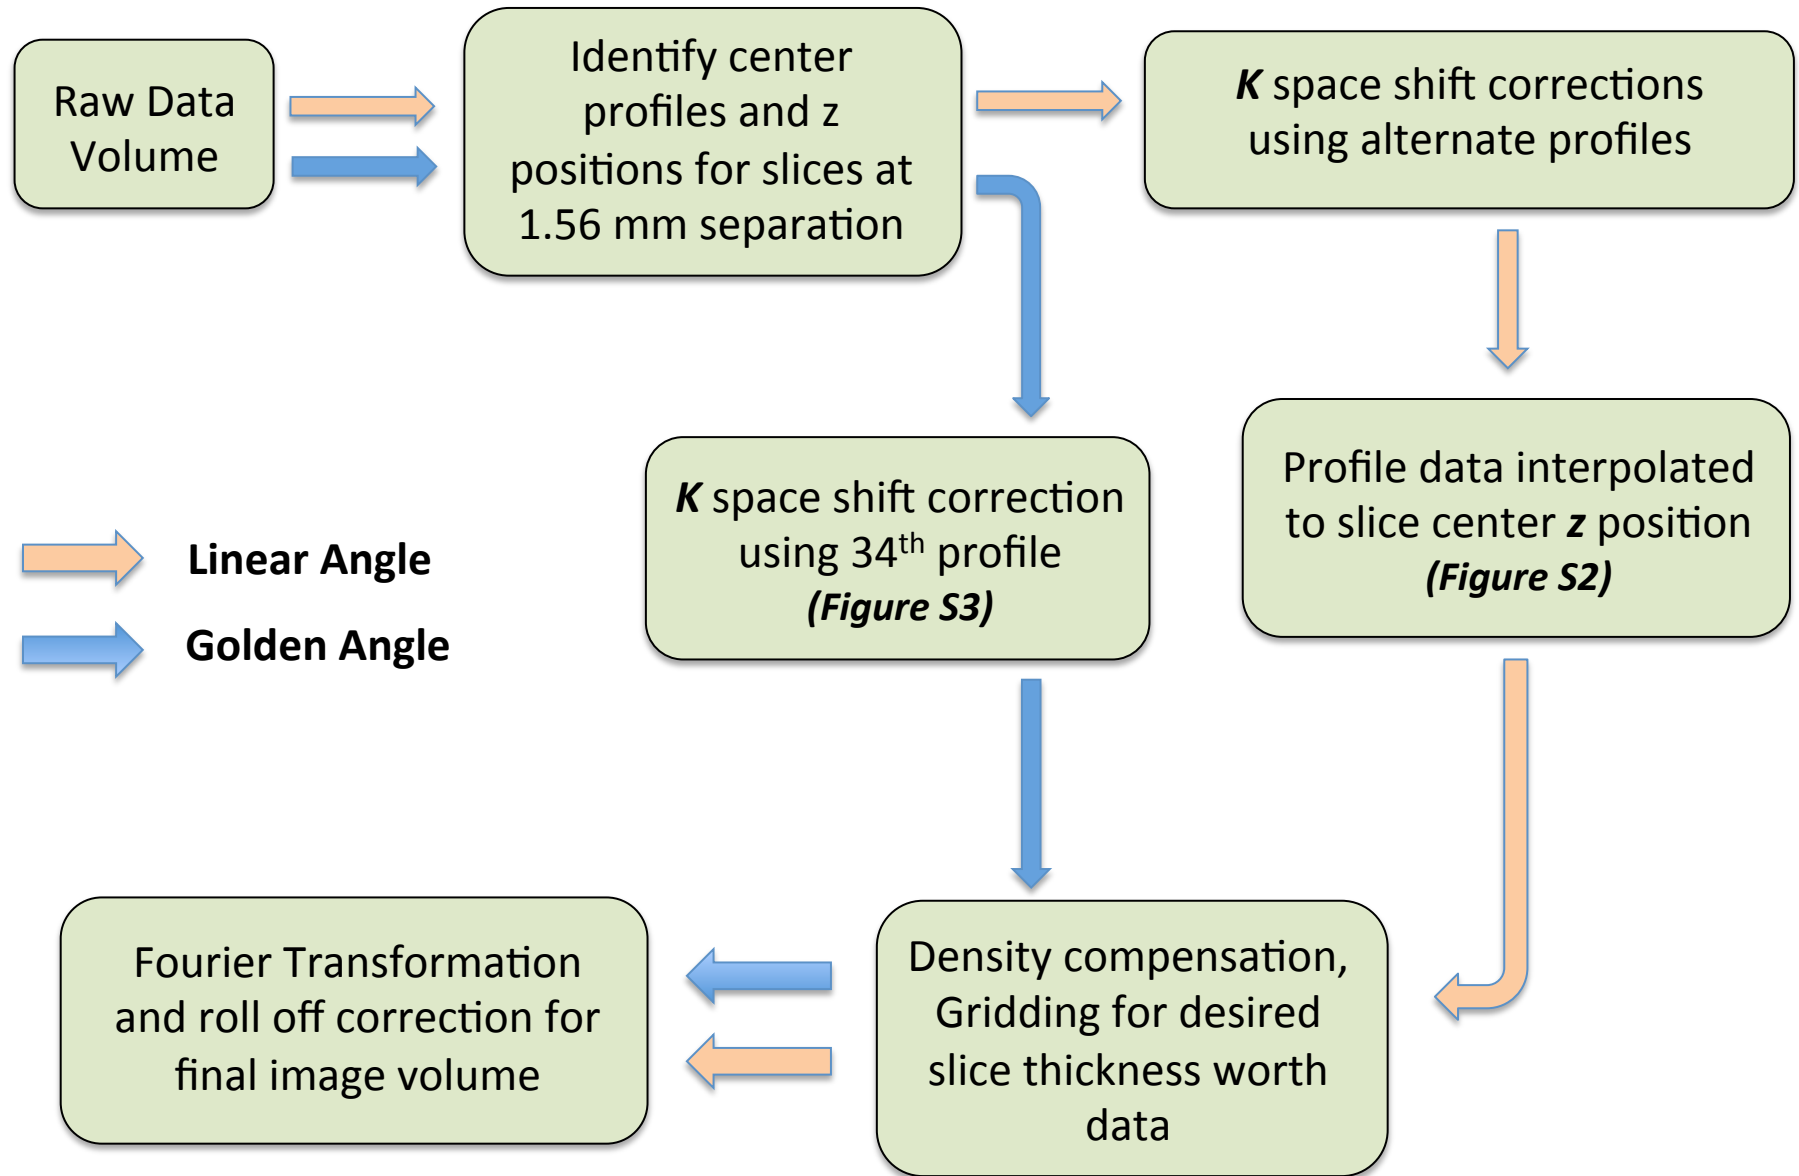

## SUPPORTING FIGURE S2 : INTERPOLATION FOR LINEAR ANGLE CMT MRI

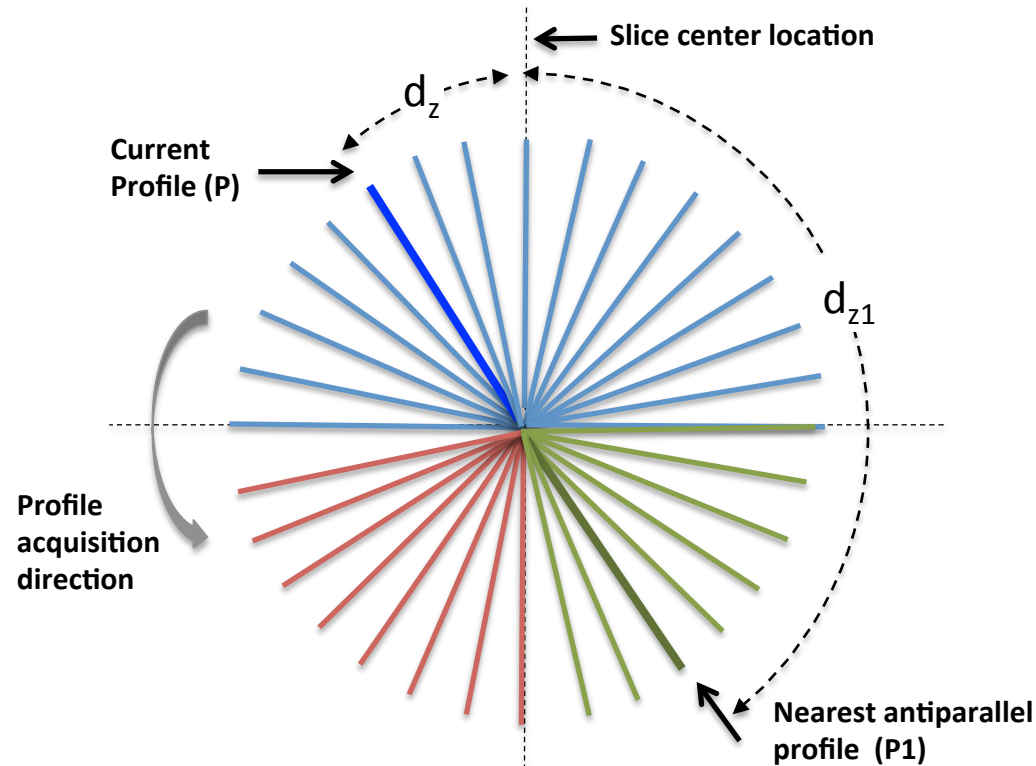

**Blue spokes** :  $N$  profiles around current slice center position

**Green spokes** : Last  $N/2$  profiles of preceding slice

**Red spokes** : First  $N/2$  profiles of next slice

$d_z$  = Z distance between current profile and slice center

$d_{z1}$  = Z distance between antiparallel profile and slice center

Interpolated Profile at slice center =  $(d_{z1} * P + d_z * P1) / (d_{z1} + d_z)$

**Note** : Only half spokes are shown for clarity.

# SUPPORTING FIGURE S3 : ANTI-PARALLEL PROFILE SELECTION FOR K SPACE SHIFT CORRECTION IN GOLDEN ANGLE CMT MRI

## Golden Angle profile plot illustrating antiparallel profile selection

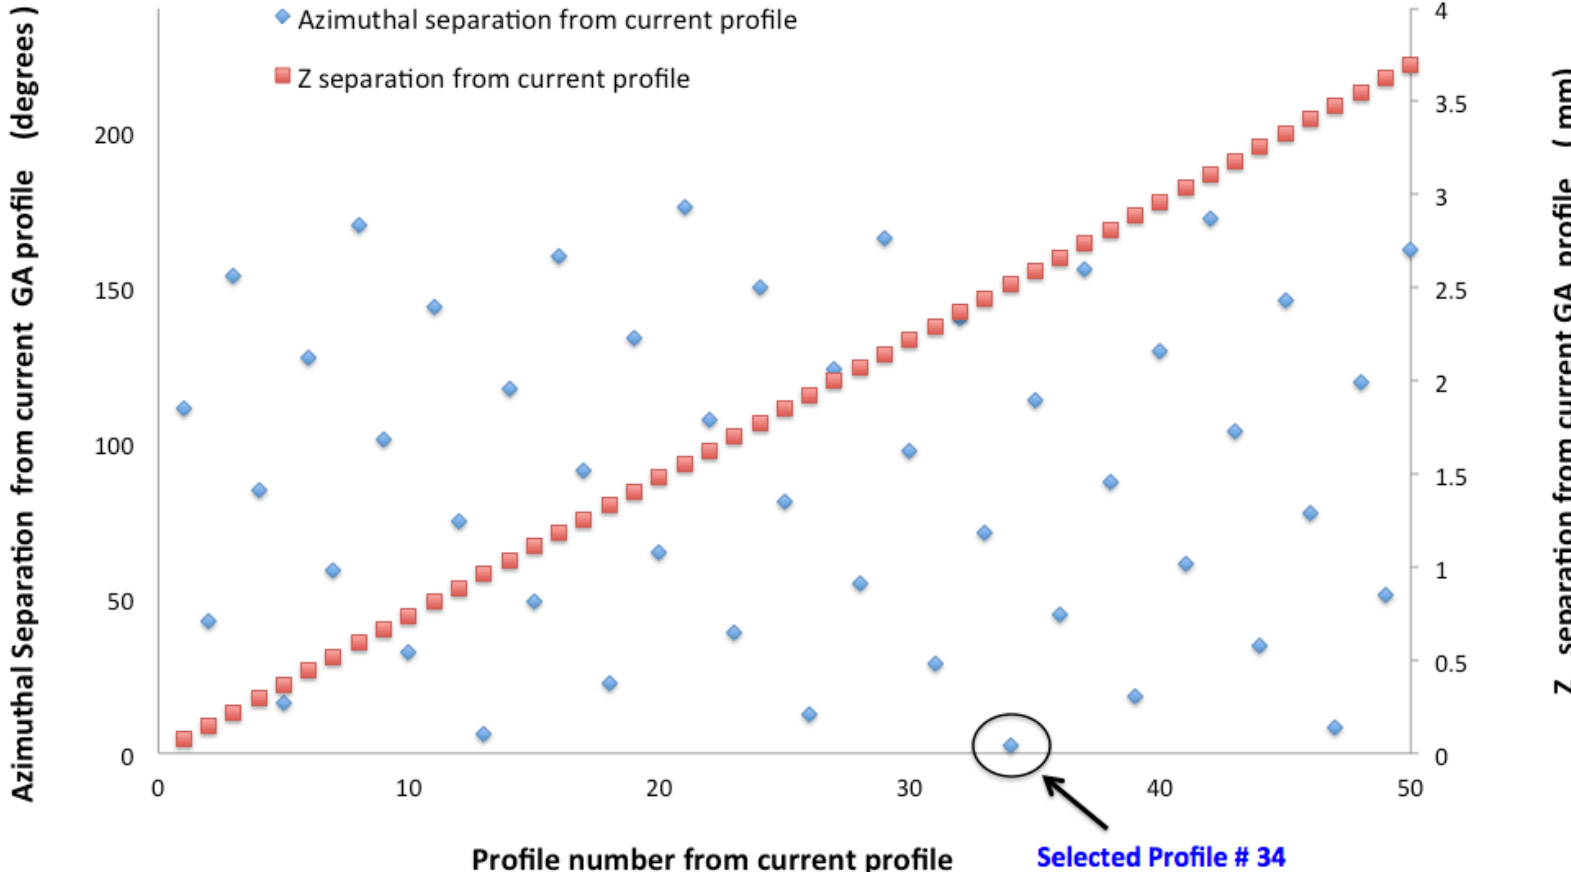

## SUPPORTING FIGURE S4 : LA CORONAL REFORMATS

LINEAR ANGLE CORONAL REFORMATS LEFT - RIGHT : 18.9 mm ( 256 pps ) , 15 mm ( 203 pps ) , 12 mm ( 162 pps ) , 9 mm ( 122 pps ) , 6 mm ( 81 pps ) , 5 mm ( 68 pps )

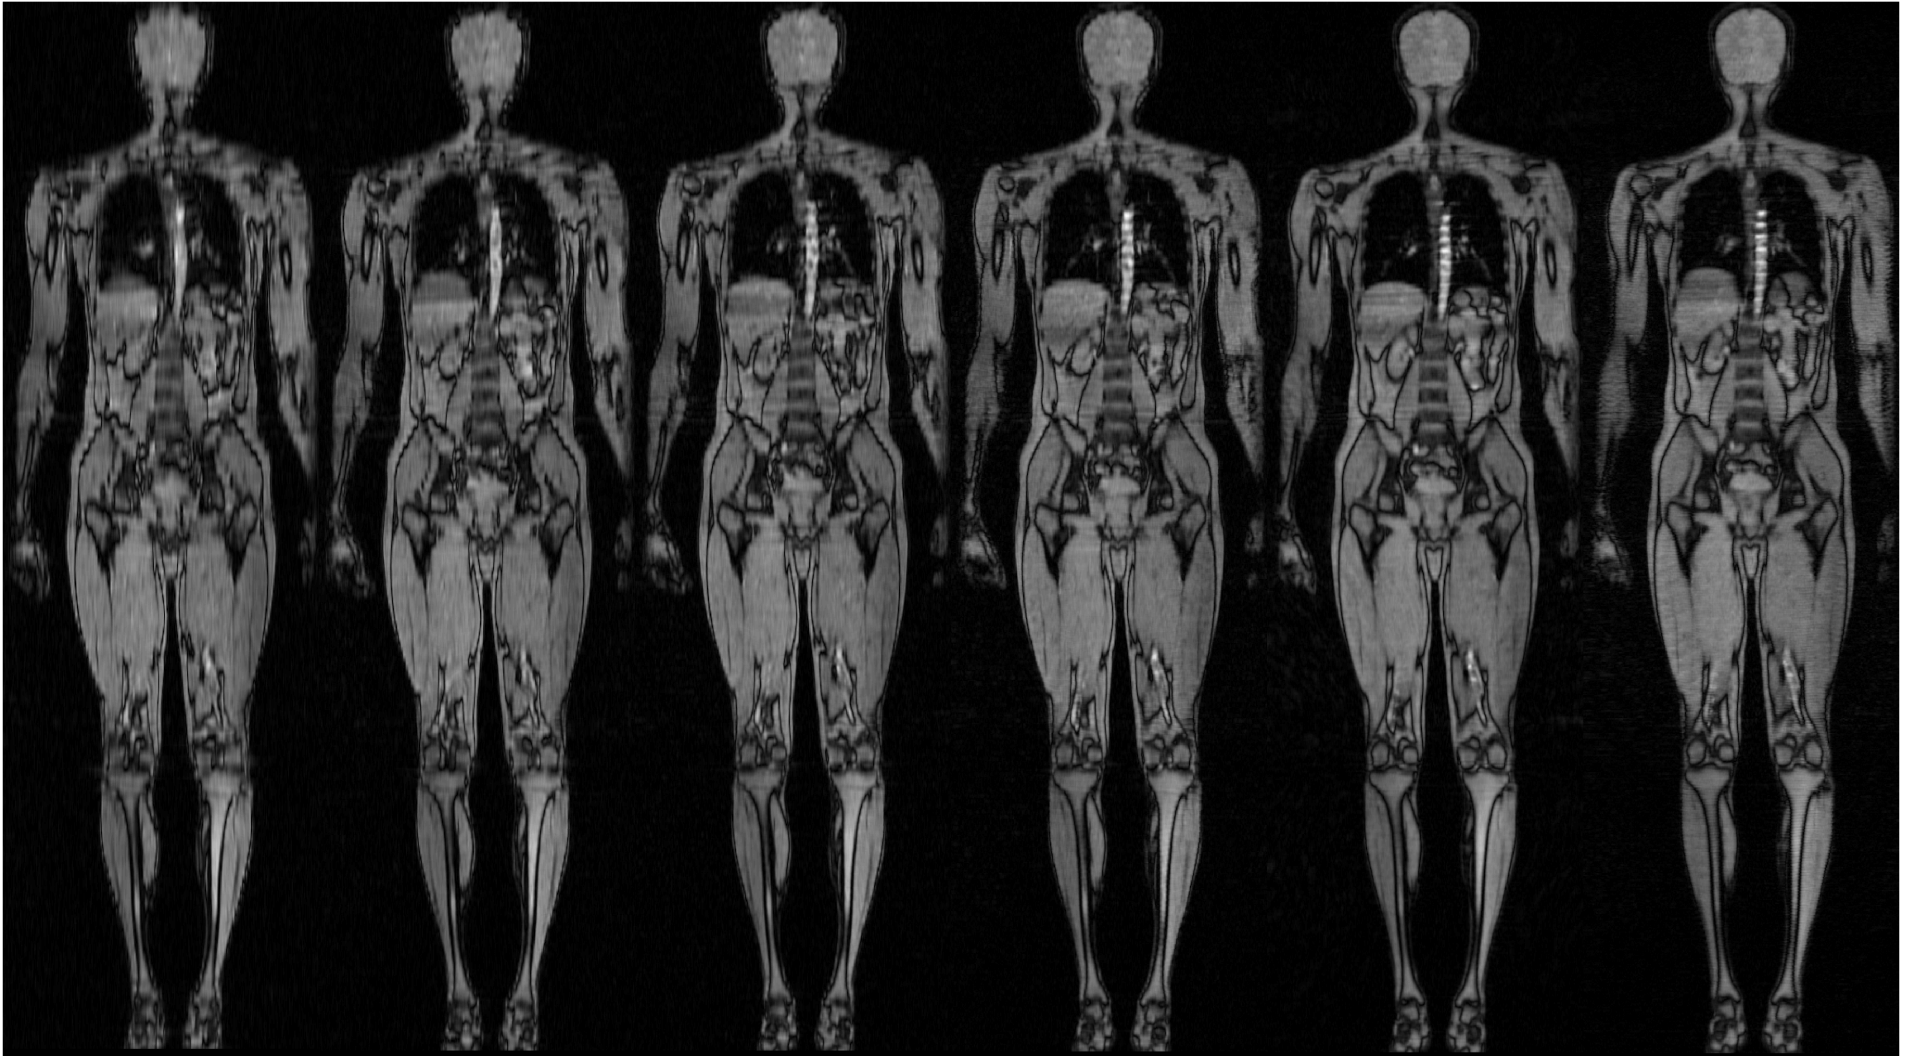

*pps: profiles per slice*

## SUPPORTING FIGURE S5 : GA CORONAL REFORMATS

GOLDEN ANGLE CORONAL REFORMATS LEFT - RIGHT : 18.9 mm ( 256 pps ) , 15 mm ( 203 pps ) , 12 mm ( 162 pps ) , 9 mm ( 122 pps ) , 6 mm ( 81 pps ) , 5 mm ( 68 pps )

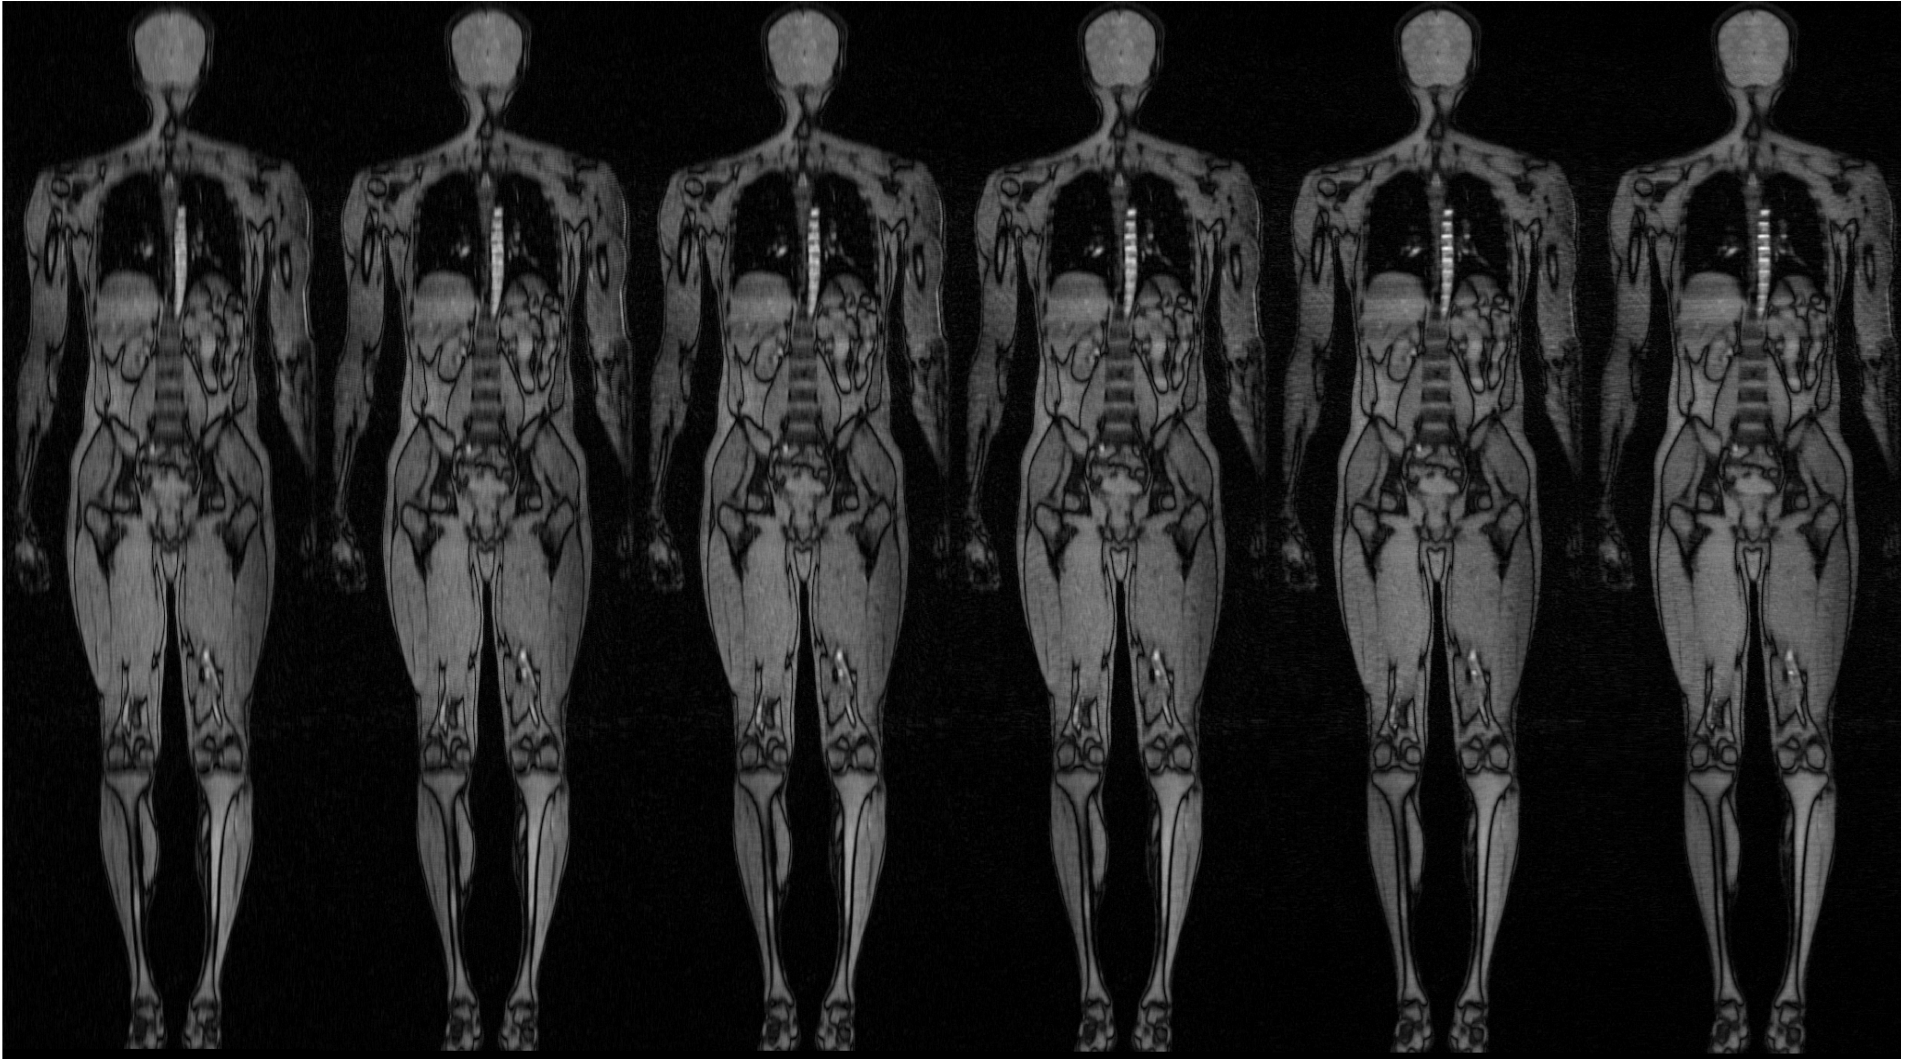

Supplement: NIHMS641430-supplement-Supp_Material.pdf [file NIHMS641430-supplement-Supp_Material.pdf]
